1       **Extracting neuronal activity signals from microscopy recordings of contractile tissue: a cell**  
2                   **tracking approach using B-spline Explicit Active Surfaces (BEAS)**

3

4                   ***Youcef Kazwiny<sup>1</sup>, João Pedrosa<sup>2,3</sup>, Zhiqing Zhang<sup>1</sup>,***  
5                   ***Werend Boesmans<sup>4,5</sup>, Jan D'hooge<sup>2</sup>, Pieter Vanden Berghe<sup>1</sup>***

6

7

8       <sup>1</sup>Laboratory for Enteric NeuroScience (LENS), Translational Research Center for Gastrointestinal  
9                   Disorders (TARGID), University of Leuven (KU Leuven), Leuven, Belgium

10       <sup>2</sup>Laboratory of Cardiovascular Imaging and Dynamics, Department of Cardiovascular Sciences,  
11                   University of Leuven (KU Leuven), Belgium

12       <sup>3</sup>Institute for Systems and Computer Engineering, Technology and Science, INESC TEC, Porto,  
13                   Portugal

14       <sup>4</sup>Department of Pathology, GROW-School for Oncology and Developmental Biology, Maastricht  
15                   University Medical Center, Maastricht, The Netherlands.

16       <sup>5</sup>Biomedical Research Institute (BIOMED), Hasselt University, Hasselt, Belgium.

17

18

19

20

21                   \*Correspondence: Pieter Vanden Berghe, [pieter.vandenbergh@kuleuven.be](mailto:pieter.vandenbergh@kuleuven.be)

22

23

24 **Abstract**

25  $\text{Ca}^{2+}$  imaging is a widely used microscopy technique to simultaneously study cellular activity in multiple  
26 cells. The desired information consists of cell-specific time series of pixel intensity values, in which the  
27 fluorescence intensity represents cellular activity. For static scenes, cellular signal extraction is  
28 straightforward, however multiple analysis challenges are present in recordings of contractile tissues,  
29 like those of the enteric nervous system (ENS). This layer of critical neurons, embedded within the  
30 muscle layers of the gut wall, shows optical overlap between neighboring neurons, intensity changes  
31 due to cell activity, and constant movement. These challenges reduce the applicability of classical  
32 segmentation techniques and traditional stack alignment and regions-of-interest (ROIs) selection  
33 workflows. Therefore, a signal extraction method capable of dealing with moving cells and is insensitive  
34 to large intensity changes in consecutive frames is needed.

35 Here we propose a b-spline active contour method to delineate and track neuronal cell bodies based on  
36 local and global energy terms. We develop both a single as well as a double-contour approach. The latter  
37 takes advantage of the appearance of GCaMP expressing cells, and tracks the nucleus' boundaries  
38 together with the cytoplasmic contour, providing a stable delineation of neighboring, overlapping cells  
39 despite movement and intensity changes. The tracked contours can also serve as landmarks to relocate  
40 additional and manually-selected ROIs. This improves the total yield of efficacious cell tracking and  
41 allows signal extraction from other cell compartments like neuronal processes. Compared to manual  
42 delineation and other segmentation methods, the proposed method can track cells during large tissue  
43 deformations and high-intensity changes such as during neuronal firing events, while preserving the  
44 shape of the extracted  $\text{Ca}^{2+}$  signal. The analysis package represents a significant improvement to  
45 available  $\text{Ca}^{2+}$  imaging analysis workflows for ENS recordings and other systems where movement  
46 challenges traditional  $\text{Ca}^{2+}$  signal extraction workflows.

47

## 48 **Introduction**

49 In order to understand how complex cellular systems operate and interact with each other, it is essential  
50 to be able to record activity from many individual cells simultaneously. Fluorescent calcium ( $\text{Ca}^{2+}$ )  
51 imaging, either with small organic  $\text{Ca}^{2+}$  indicators or with genetically encoded  $\text{Ca}^{2+}$  indicators (GECI),  
52 (1, 2) is a widely used method to study large amounts of cells simultaneously and examine their network  
53 activity. Since cytosolic  $\text{Ca}^{2+}$  changes are tightly linked to action potential firing (and thus activity) in  
54 excitable cells like neurons, this imaging technique allows inferring neuronal activity of a large cellular  
55 population in both the central and peripheral nervous systems (3). Recent improvements in  $\text{Ca}^{2+}$   
56 indicator quality (higher quantum efficiency and therefore better signal to noise) and imaging  
57 technologies allow monitoring larger populations of neurons at higher spatiotemporal resolution.

58 An extra complexity with live imaging of cells is that they may not be stationary in the microscopic field  
59 of view, either because they traffic themselves or the tissue, in which they are embedded, is contractile.  
60 Recordings in the central nervous system and acute brain slices can be assumed to have static scenes  
61 where the only movements present are motion artifacts such as drift, as in brain slices, or cyclic  
62 movements, as induced by breathing in intravital recordings. However, recording activity from tissues  
63 with a predominantly contractile function, such as the heart or the intestine, or from *in vivo* imaging of  
64 awake animals (zebrafish, *C. elegans*, etc) presents unique challenges due to the drastically high level  
65 of movement caused by muscle contractions.

66 In the intestine, all motor activity is controlled by a continuous network of neurons and glia cells  
67 embedded in between two concentric muscle layers. This enteric nervous system (ENS) regulates gut  
68 functions such as motility, secretion, and absorption (4,5). To understand how the complex circuits in  
69 the ENS operate to produce functional output, it is necessary to record and analyze the activity of large  
70 populations of ENS cells.

71 A traditional analysis workflow in  $\text{Ca}^{2+}$  imaging starts with image registration of the recorded frames to  
72 correct for motion artifacts and slight underlying movements aiming to attain a completely static scene  
73 where each pixel represents the same physical location throughout all frames (6). This step, if successful,

74 is followed by signal extraction, where the different cells of interest are delineated and their pixel  
75 intensity profiles are extracted. For the large majority of  $\text{Ca}^{2+}$  imaging experiments, this workflow is  
76 sufficient to efficiently analyze cellular activity profiles and has been used extensively in ENS  $\text{Ca}^{2+}$   
77 imaging provided that contractions are restrained either pharmacologically, physically, or in  
78 combination (7,8).

79 Multiple different software packages have been developed to automate the signal extraction process and  
80 efficiently analyze the ever-longer recordings and ever-increasing  $\text{Ca}^{2+}$  imaging datasets (9,10).  
81 However, these automated analysis workflows also rely on an image registration step and assume that  
82 all objects in the image are spatially static after this step, in order to extract their signals. Contractile  
83 movements, as those in the intestine, can include complex deformations that cannot be compensated  
84 with rigid registration techniques. More advanced non-rigid registration techniques, which offer  
85 registration with a high degree of freedom to accommodate more complex deformations, can be used  
86 but they are susceptible to high noise levels and artifacts, two regularly occurring problems in  $\text{Ca}^{2+}$   
87 imaging. The tight packing of neurons in small groups (ganglia), with their apparent overlap in optical  
88 recordings (Fig. 1A), is a first challenge that eliminates the use of classic segmentation workflows.  
89 Moreover, the rapidly oscillating fluorescence of active neurons in  $\text{Ca}^{2+}$  imaging (Fig. 1B) has a negative  
90 impact on the success rate of registration algorithms as these rely on pixel intensity or image feature  
91 matching and thus have endogenous problems with changes in intensity (7,11,12). ENS  $\text{Ca}^{2+}$  imaging  
92 combines the aforementioned challenges and thus urges the development of an alternative analysis  
93 workflow to delineate and track individual cells in moving tissues, and extract their signals throughout  
94 the recordings.

**Figure 1: General features of  $\text{Ca}^{2+}$  imaging in the ENS.** **A)** The appearance of an individual GCaMP expressing enteric neuron when not surrounded by other neurons (Left). The overlapping appearance of enteric neurons (arrow) and lack of clear borders (arrowhead) (Right). Scale bar represents 50  $\mu\text{m}$ . **B)** an example of the fluorescence signal increases between a neuron at rest (left, and marked with a dashed line) and during activity (right). **C)** ENS ganglion (left) containing approximately 20 neurons. Imposed images of different timepoint (colorcoded in green and magenta) in an ENS  $\text{Ca}^{2+}$  recording (1 sec. interval between frames). The mismatch in colors indicates the amount of movement that can be present between 2 frames.

95

96 A viable alternative to registration in these complex scenarios is cell tracking. While tracking techniques  
97 have been extensively used in cell migration analysis and lineage tree construction (13–15), the low  
98 level-based segmentation techniques (15,16) that are normally used in these applications perform poorly  
99 in ENS recordings since they are prone to noise, variability in the edge intensity due to overlap, and  
100 cannot adapt to the blinking cell appearance between different frames (17). The existing region-based  
101 tracking techniques are not sufficient to segment complex structures based on their texture information  
102 (18,19). Moreover, they are ineffective when dealing with nonhomogeneous and overlapping objects,  
103 such as cells with bright cytoplasm and dark nuclei (Fig. 1A) as is the case with the expression of the  
104 common  $\text{Ca}^{2+}$  indicator GCaMP. Only one report, by Hennig *et. al.* (20) was published, in which nucleus  
105 tracking of ENS neurons was used, by means of edge detection where dark nuclei were identified and  
106 segmented in each frame to extract fluorescent GCaMP signals from their surrounding pixels.  
107 Practically, manual region-of-interest (ROI) selection remains the most commonly used approach to  
108 analyze ENS recordings, at least for those in which motion can be easily corrected. Recordings that rigid  
109 registration cannot stabilize are routinely disregarded.

110 Due to its ease of application and flexibility in handling cell division, the main method used in the cell  
111 tracking field is segmentation, based on implicit functions such as level-sets (21–23). However, the  
112 large flexibility in this implicit topological representation can easily produce incorrect results (24)  
113 especially in low signal to noise ratio (SNR) recordings. In these situations, explicit functions such as  
114 explicit active contours (25) perform better as they depend on parameters and therefore their evolution  
115 is more restricted and faster to calculate (26). The main disadvantage of explicit active surfaces is the  
116 inability in handling cell division, which is not relevant in the specific context of tracking neurons (16).  
117 In this paper, we implement B-spline-Explicit Active Surfaces (BEAS) as developed by Barbosa *et. al.*  
118 (27) which allows the application of local and global region-based energy terms in segmentation, as  
119 originally developed for level-set segmentation (28), while controlling contour smoothness and keeping  
120 the computational cost low (27,29). This method is suitable to segment heterogeneous objects (such as  
121 cells with dark nuclei, with varying degrees of brightness and edge clarity, Fig 1B) and to apply multiple  
122 local and global energy terms to reach that goal.

123 In this paper, we use the BEAS framework on 2D microscopy recordings to track and analyze multiple  
124 cells within a contractile and moving ENS tissue. Apart from employing multiple global and local energy  
125 terms to direct contour evolution, we also use a competition penalty to limit and manage overlap between  
126 neighboring cells. Furthermore, we develop ‘double contour (DC)’ tracking, a novel method that couples  
127 the development of two contour layers and takes advantage of the typical appearance of GCaMP  
128 expressing cells. Due to the nuclear exclusion of GCaMP, these cells present in  $\text{Ca}^{2+}$  imaging recordings  
129 with a dark nucleus and a bright cytoplasm, the edges of which are respectively tracked by the two  
130 layers. This DC method enables accurate cell tracking even in the absence of visible external borders.  
131 We describe the elements in the  $\text{Ca}^{2+}$  imaging and cell tracking algorithm developed and make this  
132 information freely available for external use.

133 In conclusion, we aimed to develop a set of techniques to better extract cellular activity levels from  $\text{Ca}^{2+}$   
134 imaging recordings of non-static moving cells (Fig. 2). To this end, we used the ENS as a model system  
135 harboring fairly complex movement and activity-dependent intensity changes. The resulting workflow  
136 is however flexible and can be used to analyze other cellular recordings by tweaking the contour  
137 parameters to match the specific application.

## 138 **Methodology**

139 The workflow for the proposed cell tracking approach starts by drawing an ellipse around the cell to  
140 initialize the contour. This step is followed by deforming the contour iteratively by applying forces on  
141 individual contour control points until the functional energy minimum is reached as an initial  
142 segmentation step, which theoretically overlays the contour with the cell’s boundary. The initialization  
143 is followed by the cell tracking loop, which consists of a series of consequent segmentation tasks on  
144 individual frames, where each contour in a frame is used to initialize the contour’s segmentation on the  
145 following frame. During an intermediate step, parametric information about the contour is calculated  
146 and the contour center is also recalculated to be in the geometric centroid of the produced contour shape  
147 to ensure that the new center is inside the cell in each next frame, even if there was movement between

148 frames (Suppl. Fig. 1). By stringing the segmentation results together, we acquire both the location of  
149 individual cells as well as their contours throughout the entire recording (Fig. 2 B).

**Figure 2:** A) diagram of the processing workflow including the main steps of cell tracking (Blue) and the optional ROI tracking (grey). B) Example of the performance of the cell tracking procedure of multiple cells in ENS recordings, using one-layer tracking (left) and double contours (right)

150 The goal of this approach is to use these dynamic contours as regions-of-interest (ROIs) from which the  
151 mean intensity signal is extracted to accurately represent  $\text{Ca}^{2+}$  activity of cells in a non-static setting.  
152 These contours are then evaluated by the user. Furthermore, the tracked cell locations can also be used  
153 as landmarks to optionally track or displace additional and manually created ROIs, in cases where a  
154 tracked cell's contour was not satisfactory or when tracking additional ROIs posthoc is desired (Fig. 2  
155 A).

### 156 **B-Spline Explicit Active contours algorithm (BEAS)**

157 We implement the B-Spline Explicit Active Surfaces (BEAS) (30) framework developed and optimized  
158 for segmenting and tracking heart chambers in echocardiography (29–31). The method uses an explicit  
159 function to represent the boundary of an object, where coordinates of the contour points are explicitly  
160 given as a function of the remaining coordinates i.e.,  $x_1 = \psi(x_2, \dots, x_n)$  where  $\psi$  is defined as a linear  
161 combination of B-spline basis functions

$$x_1 = \psi(x_2, \dots, x_n) = \psi(\mathbf{x}^*) = \sum_{\mathbf{k} \in \mathbb{Z}^{n-1}} c[\mathbf{k}] \beta^d\left(\frac{\mathbf{x}^*}{h} - \mathbf{k}\right) \quad \text{Eq. 1}$$

162 where  $\beta^d(\cdot)$  is the uniform symmetric B-spline of degree  $d$ . The knots of the B-splines are located on a  
163 rectangular grid, with a regular spacing given by  $h$ . The coefficients of the B-spline representation are  
164 gathered in  $c[\mathbf{k}]$ . For this 2D segmentation problem, a polar coordinate system was chosen.

165 The evolution of the contour is governed by the minimization of the energy term  $E$ . This energy has two  
166 elements, the image data term  $E_d$  and an internal energy  $E_r$ .

$$E = E_d + E_r \quad \text{Eq. 2}$$

167

168 **Data attachment**

169 **One-layer Contour**

170 The data attachment energy term can be defined, following the BEAS formulation, as:

$$E_d = \int_{\Omega} \delta_{\phi_{\text{cyt}}}(\mathbf{x}) \int_{\Omega} B(\mathbf{x}, \mathbf{y}) \cdot F_{\text{cyt}}(\mathbf{y}) d\mathbf{y} d\mathbf{x} \quad \text{Eq. 3}$$

171 where  $F_{\text{cyt}}(\mathbf{y})$  is the energy criterion driving the evolution of the contour and  $B(\mathbf{x}, \mathbf{y})$  is a mask function  
172 in which the local parameters that drive the evolution are estimated.  $\delta_{\phi_{\text{cyt}}}(\mathbf{x})$  is the Dirac operator applied  
173 to the level set function  $\phi(\mathbf{x}) = \Gamma(\mathbf{x}^*) - x_1$  which is defined over the image domain  $\Omega$ . The mask  
174 function  $B(\mathbf{x}, \mathbf{y})$  for a node (neighborhood radius) is specified as a column of pixels of length  $\rho$  in the  
175 normal direction centered around a contour node. The value of  $\rho$  is chosen a priori, based on the expected  
176 margin (frontier) size between objects and the rate of movement between frames. When segmenting  
177 GCaMP expressing cells, it is logical to set this parameter to be slightly smaller than the approximate  
178 radius of cells, to avoid detecting the cytoplasm-nucleus edge instead of the intracellular interface. The  
179 degree of visibility of a cell's border in  $\text{Ca}^{2+}$  imaging is quite variable as its strength is based on the  $\text{Ca}^{2+}$   
180 concentration inside the cell of interest as well as that of adjacent cells. Moreover, the imaging  
181 conditions and imaging system chosen also impact the cell's appearance (Fig. 1A). Therefore, we chose  
182 a flexible localized energy term introduced by Yezzi et al. (32) (Eq. 4), to maximize the difference of  
183 mean intensity inside and outside each contour node.

$$F_{\text{cyt}} = -(u_{\text{cyt}} - u_{\text{out}})^2 \quad \text{Eq. 4}$$

184 Where  $u_{\text{cyt}}$  and  $u_{\text{out}}$  are the mean intensity values in the cytosolic region (inside the cell) and the region  
185 outside of the cell, respectively.

186 **Double Contour**

187 In live fluorescent imaging (eg. in  $\text{Ca}^{2+}$  imaging), the interface between the bright cytoplasm, which can  
188 be dim if intracellular  $\text{Ca}^{2+}$  concentrations are low, and the heterogeneous background may lack contrast



189 and as such limit cell tracking capability. GCaMP expressing cells have a bright cell body and a dark  
 190 nucleus because the GCaMP molecule molecules do not enter the nucleus. Therefore, a second, and  
 191 often sharper interface, between the dark nucleus and the bright cytoplasm emerges. This interface is  
 192 stable and has a predictable (dark) inner side and (bright) outer side. Therefore, we developed a coupled  
 193 two-layer active contour segmentation of cells. The two layers delineate the nucleus-cytoplasm and the  
 194 cytoplasm-background interfaces, respectively. The inner layer  $\phi_{\text{nuc}}$  is delineating the stable shape of  
 195 the nucleus while the outer contour  $\phi_{\text{cyt}}$  attempts to delineate cell outer borders forming a “double  
 196 contour”. The image-data energy term can then be defined as:

$$E_d = \int_{\Omega} \delta\phi_{\text{nuc}}(\mathbf{x}) \int_{\Omega} B(\mathbf{x},\mathbf{y}) \cdot F_{\text{nuc}}(\mathbf{y}) d\mathbf{y}d\mathbf{x} + \int_{\Omega} \delta\phi_{\text{cyt}}(\mathbf{x}) \int_{\Omega} B(\mathbf{x},\mathbf{y}) \cdot F_{\text{cyt}}(\mathbf{y}) d\mathbf{y}d\mathbf{x} \quad \text{Eq. 5}$$

197 with  $F_{\text{nuc}}$  following  $F_{\text{cyt}}$  in its definition (Eq. 4). The double contour produces a more stable contour  
 198 progression and keeps the contour attracted to cells in the event of non-visible cellular borders (Fig. 3).  
 199 It also allows the extraction of the signal that originates from the cytoplasm pixels only, which improves  
 200 the signal to noise ratios of the extracted mean fluorescence.

**Figure 3:** The effect of a competition term on neighboring contours (top) The contour of a cell using 1-layer vs double contour in a GCaMP expressing neuron (bottom)

201

## 202 Data regularization

203 The energy term  $E_r$  relates to curvature, size, and size difference compared to the previous frame. We  
 204 use prior knowledge about the properties of ENS neurons to impose local and global penalties to guide  
 205 the contours and ensure that segmentation results and contour shapes will be plausible in their curvature,  
 206 size, and size differential between timesteps. The regularization term  $E_r$  is defined as:

$$E_r = w_{\kappa}E_{\kappa} + w_A E_A + w_{AS}E_{AS} \quad \text{Eq. 6}$$

207 The curvature energy term  $E_\kappa$  limits the negative local mean curvature since cell bodies mostly have  
208 positive curvature. The local curvature gradient term is given by:

$$\frac{\partial E_\kappa}{\partial c_{W_p}[\mathbf{k}_i]} = \int_{\Gamma} \kappa(\mathbf{x}^*) H(-\kappa(\mathbf{x}^*)) \beta^d \left( \frac{\mathbf{x}^*}{h} - \mathbf{k}_i \right) d\mathbf{x}^* \quad \text{Eq. 7}$$

209 Where  $\kappa$  is the local mean curvature which is calculated efficiently as reported within the BEAS  
210 framework (29,33) and  $H$  is the Heaviside function.

211 The area energy term  $E_A$  keeps the size of the contour within a reasonable range, where  $A$  represents the  
212 area within the contour. The parameters  $A_{\min}$  and  $A_{\max}$  ensure that the contour does not engulf bigger  
213 image regions. The equation for local energy calculation is governed by:

$$\frac{\partial E_A}{\partial c_{W_A}[\mathbf{k}_i]} = (A - A_{\min}) H(A_{\min} - A) + (A_{\max} - A) H(A - A_{\max}) \quad \text{Eq. 8}$$

214 Next, we add the area stability energy term  $E_{AS}$ , which is a global energy term that attempts to minimize  
215 the change of the area within the contour keeping its size in a reasonable range for a cell, since apparent  
216 size changes are not real but are due to intensity variations or edge contrast changes and not caused by  
217 actual cell size changes.

$$E_{AS} = \frac{\|A_t - A_{t-1}\|}{A_{t-1}} \quad \text{Eq. 9}$$

218 The weights  $w_\kappa$ ,  $w_A$  and  $w_{AS}$  in Eq. 6 are chosen by the user based on image dimensions and cell types.

## 219 Contour Competition

220 It is common for cells in microscopy recordings to appear overlapping, as an image is a projection of  
221 all fluorescent elements in the focus of the objective lens. Especially in widefield microscopy recordings  
222 where images result from many different in- and out-of-focus planes (34). This effect is minimized in  
223 confocal and multiphoton excitation approaches, but optical overlap remains an issue due to limited  
224 optical resolution. While banning overlap completely can facilitate interpretation of the extracted data,  
225 it does not represent the scene correctly and can lead to tracking errors. Therefore, we impose a

226 competition penalty that allows a slight contour overlap to account for the optical overlapping effect  
 227 while preventing contours from jumping between cells or engulfing multiple cells. We opted to impose  
 228 a proximity penalty between neighboring contour nodes, as implemented previously in BEAS (35), to  
 229 limit contour expansion into neighboring contours and reduce overlap ( $E^{dist}$ ),

$$E_{i \rightarrow j}^{dist}(\mathbf{x}^*) = (d_T - \boldsymbol{\psi}^{i \rightarrow j}) \cdot H(d_T - \boldsymbol{\psi}^{i \rightarrow j}) \quad \text{Eq. 10}$$

230 where  $d_{thresh}$  represents the minimal distance parameter,  $\psi$  is a signed distance map between each node  
 231 of the contour  $i$  against all nodes of contour  $j$  (and vice-versa), and  $H$  is the Heaviside operator. Note  
 232 that  $H$  equals one only in nodes with  $\psi$  lower than  $d_{thresh}$  and zero in the remaining nodes. Therefore, it  
 233 only applies penalties in the neighboring regions of the contours (35).

234 We also added a stronger penalty for actual overlap on both contours ( $E_{overlap}$ ) producing a cell  
 235 competition effect controlled by the cell competition weight parameter  $w_c$  (Fig. 3) that is *a priori* chosen.

$$E_{overlap}(i,j) = \begin{cases} w_c A_c(i,j) , & D1 \cap D2 \neq \emptyset \\ 0 & D1 \cap D2 = \emptyset \end{cases} \quad \text{Eq. 11}$$

236 With  $D1$ ,  $D2$  being the pixels belonging to contour  $i$  and  $j$ , respectively and  $A_c$  is the area of overlap  
 237 between two cells. Then Eq. 6 for contour  $i$  with a neighboring contour  $j$  can be rewritten to include the  
 238 competition terms:

$$E_r^i = w_\kappa E_\kappa + w_A E_A + w_{AS} E_{AS} + E_{dist}(i,j) + E_{overlap}(i,j) \quad \text{Eq. 12}$$

### 239 Landmark-based geometrical transformation and ROI tracking

240 While we aim at effective cell tracking in every scenario using BEAS cell tracking, there are known  
 241 challenges that can constrain tracking using active contour methods. These challenges include parameter  
 242 sensitivity causing the algorithm to be suboptimal for some cells in the field of view, despite being  
 243 successful for other cells. Therefore, we introduce a robust optional step that uses the tracked locations  
 244 of  $N$  cell contours using the BEAS approach as landmarks to find the optimal geometrical transformation  
 245  $T$  that represents the movement in the recorded scene between frames. The optimal parameters  $\theta^*$  of  $T$

246 are estimated by minimizing the similarity measure  $d$  (36, 37) which represents the Euclidian distance  
247 of the cell contour coordinates between two frames:

$$\theta^* = \underset{\theta}{\operatorname{argmin}} d(f_T, f + 1) = \underset{\theta}{\operatorname{argmin}} \sum_{i=1}^N \|x_i^{f+1} - T(x_i^f)\|^2 \quad \text{Eq. 13}$$

248 With  $x_i^f$  being the centroid coordinates  $x$  of the contour  $i$  in frame  $f$ . This geometrical transformation  
249 allows us to move additional ROIs selected manually by the user *posthoc* throughout the recording  
250 frames by performing the geometrical transformation  $T$  (38) on the positions of the ROIs.

### 251 **Implementation details**

252 Initialization is done by manually selecting ellipses that roughly overlap with the targeted cell bodies.  
253 These ellipses are fed as initial contours to the first frame segmentation step. The result of contour  
254 segmentation in a frame is then used for contour initialization in the next frame. Practically, the  
255 neighborhood radius  $\rho$  determines the range of cell movement between frames that is detectable by the  
256 segmentation step.  $\rho$  is chosen empirically to detect large movements without extending far off the cell  
257 edge and losing its ability in finding local cell edges and relies on multiple parameters including image  
258 resolution and relative movement (Suppl. data). During the initialization step, overlap was not allowed  
259 to simplify the initial contour interactions and limit entanglement in later segmentation steps.  
260 We choose to represent the B-spline contours in polar coordinates because cell bodies appear as closed  
261 ellipses. Therefore, the geometry functions took the form of  $r=\psi(\theta)$ . The geometrical center of the  
262 contour shape is calculated and the pole of the contour coordinates translated to this point after each  
263 time step (Suppl. Fig. 1). This step is essential as contours cannot be represented as a polar curve if the  
264 pole (coordinates' origin) is outside of the cell contour.

265 The angular discretization factor denoting contour boundary nodes was set empirically to 32 nodes with  
266 regular angular interval  $d\theta$ . When applied to the experimental recordings, this setting was found to  
267 provide a good balance between shape flexibility and representation at a reasonably low computational  
268 cost. We measured its effect and that of other parameters in a dedicated parameter sensitivity test. New

269 contour nodes were resampled after the translation step to preserve the accuracy levels of the  
270 discretization and maintain the regular interval  $d\theta$ . This was done by using linear interpolation of the  
271 contour nodes' coordinates  $(r', \theta')$  for polar angles  $\theta'$  with a regular  $d\theta$  interval.  
272 A modified gradient descent with feedback step-adjustment was used to perform the energy criterion  
273 minimization as explained in previous BEAS implementations (11,30). Runtime was linearly dependent  
274 on the number of cells and the image size. The geometrical transformations  $T$  used in landmark-based  
275 ROI tracking is implemented in the form of a polynomial affine transformation (39).

276

## 277 **Results**

### 278 **A. Segmentation strategy evaluation**

279 To objectively evaluate the presented segmentation strategies, we created an artificial dataset that  
280 simulates the  $\text{Ca}^{2+}$  imaging scenes, featuring movement at rates similar to what is measured in ENS  
281 recordings, several intensity-change patterns that represent  $\text{Ca}^{2+}$  activity, overlapping neighboring cells  
282 with similar baseline intensities, and multiple blurred frames to mimic out-of-focus imaging frames (Fig.  
283 4).

**Figure 4:** Tracking of overlapping cells with the same base intensity level during rest and different intensity levels during activity using **A)** one-layer contours without a competition parameter (left) and with a competition penalty added (right) and **B)** double contours without a competition parameter (left) and with a competition penalty added (right) **C)** Extracted signals from a cell using one-layer contours (top) and double contours (bottom)

284

285 We analyzed the signals in this dataset using four different approaches and compared how the extracted  
286 signals matched the ground truth signals. Using one-layer segmentation which targets the cytoplasmic  
287 border only, without the competition term, expectedly yields poor results, with contours overlapping  
288 significantly as the contour nodes cannot find clear edges or intensity gradients (Fig. 4A, left). As a  
289 result, the extracted signals are contaminated with information from neighboring cells. On the other  
290 hand, using the competition term in addition to the fixed global curvature term anchors the contours and

291 restricts their shapes to prevent them from taking over neighboring cells (Fig. 4 A, right), which  
292 improves the extracted signal quality drastically. In contrast, the double contour segmentation maintains  
293 the general shape even without a competition penalty due to the coupling between the two segmentation  
294 layers although a slight overlap can be observed. The small overlaps, in this case, are alleviated when  
295 the competition term is added (Fig. 4 B).

296 Signals extracted from the artificial dataset confirm that one-layer contour tracking, without  
297 competition, is not reliable in extracting the original signal. This is shown in Fig. 4 C top, where the  
298 activity from the neighboring cell appears in the activity trace of the measured cell (Fig. 4 C, top row,  
299 red trace). Double contour segmentation and one-layer contours with competition terms, have no such  
300 issues and allow extraction of an accurate signal shape. This is especially the case for double contour  
301 segmentation, where the raw fluorescence level is closer to the original because now the dark nucleus  
302 pixels can be excluded from the calculation of the cytoplasm intensity (Fig. 4 C, bottom).

### 303 **B. Parameter sensitivity analysis in an artificial dataset**

304 The impact of each of the selected parameters on segmentation and tracking results using active contours  
305 in both one-layer and the double contour methods are shown in Fig. 5. The first parameter  $\rho$ , the  
306 neighborhood radius (Fig 5A), expectedly has, for smaller values, a big influence on the tracking results.

**Figure 5: Parameter sensitivity analysis: comparison between one-layer vs. double contours where the Y-axis is the normalized RMSE of the extracted signals compared to the raw signals:** (top left) effect of radius length values on segmentation sensitivity, double contour segmentation has less segmentation error for all values in the relevant range  $> 3$ . (top right) effect of the number of contour nodes: higher RMSE for one-layer segmentation for all values, note the segmentation failure of double contour method at low (e.g. sixteen) contour nodes number, as indicated with x. Curve regulation term (bottom left). Competition term (bottom right): lack of competition term causes high normalized-RMSE for one-layer segmentation.

307 Afterwards, the tracking is stable for several values until the radius is too large and tends to encounter  
308 multiple edges simultaneously. The second parameter, the matrix size, which determines the number of  
309 discretized contour nodes negatively affects the tracking at smaller matrix sizes (fewer number of nodes)  
310 for both one- and double contour tracking, with failure to track cells in case of double contour  
311 segmentation with the lowest (only sixteen) number of nodes (Fig. 5B). This indicates that due to its  
312 extra complexity, double contour segmentation is more sensitive to the number of nodes. While the  
313 curvature term does not affect the accuracy of segmentation (Fig. 5C), the addition of a competition  
314 term does improve segmentation, especially for the one-layer segmentation option. The effect of a  
315 competition term with double contour segmentation is negligible in this dataset (Fig. 5 D).

316

### 317 C. Experimental results

318 When applied to actual recordings, we find that the proposed approach successfully tracks cells  
319 throughout significant tissue movements (Fig. 6, Top panel), allowing us to reliably resolve  $\text{Ca}^{2+}$  peaks  
320 from the extracted signals (Fig. 6, bottom panel).

**Figure 6:** Contours of multiple cells and cell movement (top). Pixel intensity signal from the one tracked cell in the top panel and the contour appearance at multiple time points before, during and after a peak in  $\text{Ca}^{2+}$  activity.

321

322 To compare with traditional analysis methods, we analyzed recordings with both the new contour  
323 tracking method as well as with manual routines, involving motion correction and rectangular ROI  
324 selection by a blinded expert. For that purpose, we used datasets of 3 recordings to compare the degree  
325 of similarity of the signals extracted by the traditional method against the one-layer contour and double  
326 contour methods, respectively (Fig. 7 A, B). We found that  $\text{Ca}^{2+}$  profiles are very comparable in shape  
327 between extraction from tracked cells versus manually drawn ROIs, with a normalized root-mean-square  
328 error (RMSE) of 0.093 and 0.114 for one-layer or double contours respectively (Fig. 7 B).

**Figure 7:** A) Contours of tracked cells and manual rectangular ROIs which are moved based on the contours tracked. B) RMSE of signals extracted using 1 layer (red) and double contour (blue) versus manually selected ROIs by an expert. C) Comparison of the extracted signals (red/blue mean, light red/blue standard deviation) against a ground truth artificial peak (dotted green) using 1-layer contour tracking (left) and double contours (right) based on 22 cells. D) RMSE of signals extracted from 22 cells injected with the artificial peak using manual ROIs (left), 1 layer (center) and double contour (right) versus the ground truth.

329 True validation of our analytical approach is not straightforward as it requires assessing the quality of  
330 signal extraction against a ground truth signal. Since the latter should be fully known, yet embedded in  
331 a context that holds all the biological, optical, and experimental complexity, we generated artificial  $\text{Ca}^{2+}$   
332 peaks in real  $\text{Ca}^{2+}$  recordings in the cytoplasm of multiple moving cells (Suppl. movie 1). Then we used  
333 the contour cell tracking method to re-extract the  $\text{Ca}^{2+}$  signals and compared the extracted signals to the  
334 original planted signal. We found that the  $\text{Ca}^{2+}$  peak shape was preserved in most cells (Figure 7 C), and  
335 the median RMSE in the one-layer and double contour approach to be 0.1216 and 0.1738 (based on 22  
336 tracked cells) to be comparable to that of the manually selected ROIs with an RMSE of 0.1212 (Fig. 7  
337 D). The higher RMSE values of DC tracking are simply due to a few complete tracking failures, see  
338 *Discussion*.

339 Finally, we used the newly developed tracking approach on actual recordings of ENS tissue (Suppl.  
340 movie 2, 3) including movement in x and y and out-of-focus frames. We found that with optimized  
341 parameters one-layer segmentation, proves reliable to track many cells in the field of view. Notably, the  
342 segmentation procedure performs well despite the presence of blurry out-of-focus frames (Fig. 7), which  
343 is an important advantage compared to edge-based segmentation techniques (40). In double contour  
344 segmentation, we observed less overlap of contours without a competition penalty resulting in good  
345 reliability in cells with non-visible edges. However, this method had more difficulties in scenes with



346 faster movement and was expectedly not robust in cells without contrast between the nucleus and  
347 cytoplasm. While this new approach performs well, it is unavoidable that cell tracking fails to resolve  
348 some cells with challenging appearance or location in the image. The developed landmark ROI-tracking  
349 exploiting the known trajectory of successfully-tracked cells proved to be a useful and robust tool to  
350 overcome this challenge with minimal computational power needed (Suppl. movie 4). In addition, it  
351 gives the researcher the additional ability to extract signals from smaller structures, like cell processes  
352 or glial cells (Fig. 7 A).

## 353 **Discussion**

354 Given the complexity of  $\text{Ca}^{2+}$  imaging in the contractile ENS tissues, where a scene not only contains  
355 moving cells but these cells also display irregular fluorescence intensity changes (6), traditional methods  
356 based on image registration and ROI selection are cumbersome and prone to failure during signal  
357 extraction and quantitative analysis (3, 41–43). Additionally, low-level cell tracking techniques cannot  
358 function reliably in this scenario due to multiple reasons, including low signal-to-noise ratio (often the  
359 case in live imaging), cellular overlap and variable cellular edges, which depend both on the imaging  
360 system and the labeling approach, as well as on the activity of the cell (44). In this paper, we developed  
361 a cell tracking algorithm targeted specifically to track neurons in such a challenging contractile scenario,  
362 with the additional complexity that cells in  $\text{Ca}^{2+}$  imaging have blurry borders and constantly change  
363 fluorescence intensity. Our method successfully tracks blinking cells in moving ENS tissue, without the  
364 need for non-rigid image registration. The extracted temporal signals are comparable in quality to  
365 manual, expert-selected ROIs. Furthermore, the tracked cell coordinates allow additional rectangular  
366 ROI tracking and add robustness and flexibility to the workflow to process the most challenging  
367 recordings.

### 368 **A. Comparison of segmentation strategies**

369 In an artificial dataset that was created to simulate cell shape and behavior, specifically having moving  
370 cells without clear borders, we found the competition term to be important in one-layer cell tracking as  
371 the contours overlap and the contour nodes do not find edges to adhere to in their absence. The addition

372 of a competition term and a significant curvature term prevents them from taking over neighboring cells  
373 resulting in good signal extraction.

374 The performance of cell segmentation in this simulated dataset is consistently improved by using the  
375 novel double contour method. The double contour uses the inner nucleus contours as a natural anchor  
376 that restricts the outer contour from taking over neighboring cells. It can conserve the shape with low,  
377 or even without, competition and curvature terms. However, the advantage of the coupled double  
378 contour approach is limited in recordings with large cell displacement between frames as it depends on  
379 tracking the smaller nucleus from its position in the previous frame. In this case, higher image  
380 acquisition rates are required, which adds complexity to the imaging setup, generates bigger datasets,  
381 and causes longer processing times. Nevertheless, we consider the double contour approach to be  
382 powerful in its application to GCaMP based recordings, as the reporter is genetically prevented from  
383 entering the nucleus, leaving the nucleus dark and thus enabling accurate tracking of cells and signal  
384 extraction selectively from the cytoplasm.

## 385 **B. Parameter sensitivity analysis**

386 Active contours are heavily reliant on multiple parameters and can be sensitive to parameter values  
387 limiting their robustness (45). We quantified the effects of the global penalty terms on the algorithm's  
388 performance in both the one-layer and double contour strategies, by extracting and comparing the signals  
389 from simulated data. We observed general similarity in sensitivity to the studied parameters, except for  
390 the inability to track cells when using only a few contour nodes in the double contour, which is at odds  
391 with the increased complexity of this strategy. The introduction of the cell competition term improved  
392 cell tracking when using one-layer contours, reduced the error rate to similar values as obtained by  
393 double contours in this dataset. Although the curvature term did not increase the accuracy of the  
394 extracted signal in the simulated dataset, it plays an important stabilizing role to the cell contours in real  
395 recordings, especially in blurred images or in frames where segmentation is struggling to delineate cells  
396 returning to baseline fluorescence. We found that tracking is generally insensitive to a wide range of  
397 parameter values in the simulated dataset despite our efforts to introduce the most challenging  
398 conditions, which all together indicate that the performance of the algorithm is robust.

399 In general, the global penalty terms are valuable to limit segmentation failure, which is a drawback of  
400 active contour segmentation (28). However, they do not show significant effects on tracking results of  
401 cells that are already well within the means of the method, as shown in Fig. 5.

### 402 C. Experimental results

403 As the aim of the new approach was to extract accurate  $\text{Ca}^{2+}$  signals from experimental data, we  
404 compared contour tracking to the traditional extraction method and found a high similarity of the  
405 extracted signals between the two methods. We used an artificially embedded  $\text{Ca}^{2+}$  peak to measure the  
406 similarity to the ground truth and found that these planted peaks were indeed detected in most cells,  
407 demonstrating the applicability of the contour tracking workflow. The artificially embedded  $\text{Ca}^{2+}$  peaks  
408 were then used to compare the quality of the signal extraction using the two contour types against the  
409 traditional extraction method. Results from the one-layer contours were highly similar to those of the  
410 traditional method in their error between the extracted signal and the ground truth values of the artificial  
411 peak (Fig. 7). We observed slightly lower average similarity between the ground truth signal and double  
412 contour method, which was mainly due to instances where the method failed to track those neurons  
413 without contrast between the nucleus and cytoplasm, which we, in order to be as close to reality as  
414 possible, also included in the dataset. This is easily mitigated by using the additional ROI tracking  
415 option, which we introduced to extract signals from cells for which contour tracking is inaccurate (Fig.  
416 2A).

417 Practically, we find one-layer tracking to be robust in recordings with blurry out-of-focus frames and its  
418 stability largely depends on the neighborhood radius  $\rho$  in relation to movement intensity in-between  
419 frames. Furthermore, the introduction of a cell competition term improves cell tracking and reduces the  
420 error in experimental recordings. Double contour tracking on the other hand is useful when the recording  
421 is not blurry and the movement in-between frames is generally less than the nucleus diameter. The latter  
422 limits the applicability in recordings with substantial displacement due to rapid muscle contractions,  
423 especially when fast image acquisition is not feasible. Its main advantage, which results from the inner  
424 nucleus contour acting as an anchor to the outer cellular contour, is the ability to track overlapping cells  
425 without clearly visible borders, a common sight for ENS neurons in the submucosal layer (4). The

426 landmark-based ROI tracking possibility for manually-added ROIs provides a useful addition that  
427 allows tracking challenging cells, which the active contours method fails to correctly segment. It is a  
428 useful tool as it does not require re-running the tracking workflow and is applied post-hoc, providing a  
429 robust option fully controlled by the user.

430

## 431 **Conclusion**

432 To satisfy the need for a robust analysis tool for Ca<sup>2+</sup> imaging in moving and contractile tissues, we  
433 introduced an efficient hybrid approach to track cell bodies relying on local region-based terms in  
434 evolving the contour, avoiding the disadvantages of region-based segmentation (Fig. 2). We further  
435 developed a novel ‘double contour’ or coupled-layers tracking algorithm that takes advantage of the fact  
436 that cells in genetically encoded Ca<sup>2+</sup> imaging techniques appear with dark nuclei. We quantified the  
437 method’s performance in an artificial dataset that simulates experimental challenges under different  
438 parameter values and compared the two tracking algorithms. We then tested the algorithm’s robustness  
439 in tracking neurons in various ENS tissue Ca<sup>2+</sup> recordings and demonstrate, using embedded artificial  
440 Ca<sup>2+</sup> spikes, that the method reliably captures these spikes and represents them in the extracted signals.  
441 We expanded the analysis possibilities by implementing land-mark based ROI tracking, which increases  
442 the robustness of the workflow for challenging datasets. Finally, we packaged the workflow as a  
443 MATLAB GUI to enable efficient analysis of Ca<sup>2+</sup> imaging datasets with a non-static scenery. The  
444 technique can be used on other cellular recordings by tweaking the contour parameters to match the  
445 specific application.

446

## 447 **Acknowledgements**

448 The authors thank Tobie Martens for manual cell delineation and ROI selection on Ca<sup>2+</sup> recordings.  
449 Animal tissues used in this study were taken from mice house and euthanised according to the guidelines  
450 and procedures as approved by the Animal Ethics committee of KULeuven. The authors’ work is

451 supported by the Research Foundation Flanders (FWO) grant G.0929.15, G.OH1816N and I001918N  
452 and Hercules AKUL/11/37 and AKUL/15/37 (to P.V.B.).

453

454

## 455 **References**

- 456 1. Nakai J, Ohkura M, Imoto K. A high signal-to-noise Ca<sup>2+</sup> probe composed of a single green  
457 fluorescent protein. *Nat Biotechnol.* 2001 Feb;19(2):137-41.
- 458 2. Grienberger C, Konnerth A. Imaging calcium in neurons. *Neuron.* 2012 Mar 8;73(5):862-85.
- 459 3. Li Z, Hao MM, Van Den Haute C, Baekelandt V, Boesmans W, Vanden Berghe P. Regional  
460 complexity in enteric neuron wiring reflects diversity of motility patterns in the mouse large  
461 intestine. *Elife.* 2019;
- 462 4. Fung C, Vanden Berghe P. Functional circuits and signal processing in the enteric nervous  
463 system. *Cellular and Molecular Life Sciences.* 2020.
- 464 5. Furness JB. The enteric nervous system and neurogastroenterology. *Nature Reviews*  
465 *Gastroenterology and Hepatology.* 2012.
- 466 6. Boesmans W, Hao MM, Berghe P Vanden. Optical tools to investigate cellular activity in the  
467 intestinal wall. *J Neurogastroenterol Motil.* 2015;21(3):337–51.
- 468 7. Pnevmatikakis EA, Giovannucci A. NoRMCorre: An online algorithm for piecewise rigid  
469 motion correction of calcium imaging data. *J Neurosci Methods.* 2017;
- 470 8. Boesmans W, Martens M a, Weltens N, Hao MM, Tack J, Cirillo C, et al. Imaging neuron-glia  
471 interactions in the enteric nervous system. *Front Cell Neurosci* [Internet].  
472 2013;7(October):183. Available from:  
473 <http://www.pubmedcentral.nih.gov/articlerender.fcgi?artid=3801083&tool=pmcentrez&render>  
474 [type=abstract](http://www.pubmedcentral.nih.gov/articlerender.fcgi?artid=3801083&tool=pmcentrez&render)
- 475 9. Romano SA, Pérez-Schuster V, Jouary A, Boulanger-Weill J, Candeo A, Pietri T, et al. An  
476 integrated calcium imaging processing toolbox for the analysis of neuronal population

- 477 dynamics. Graham LJ, editor. PLOS Comput Biol [Internet]. 2017 Jun 7 [cited 2020 Feb  
478 26];13(6):e1005526. Available from: <https://dx.plos.org/10.1371/journal.pcbi.1005526>
- 479 10. Maruyama R, Maeda K, Moroda H, Kato I, Inoue M, Miyakawa H, et al. Detecting cells using  
480 non-negative matrix factorization on calcium imaging data. Neural Networks [Internet]. 2014  
481 Jul 1 [cited 2019 Jan 21];55:11–9. Available from:  
482 <https://www.sciencedirect.com/science/article/pii/S0893608014000707>
- 483 11. Kybic J, Unser M. Fast parametric elastic image registration. IEEE Trans Image Process.  
484 2003;
- 485 12. Sorokin D V., Peterlik I, Tektonidis M, Rohr K, Matula P. Non-Rigid Contour-Based  
486 Registration of Cell Nuclei in 2-D Live Cell Microscopy Images Using a Dynamic Elasticity  
487 Model. IEEE Trans Med Imaging. 2018;
- 488 13. Hilsenbeck O, Schwarzfischer M, Skylaki S, Schauburger B, Hoppe PS, Loeffler D, et al.  
489 Software tools for single-cell tracking and quantification of cellular and molecular properties.  
490 Nature Biotechnology. 2016.
- 491 14. Bise R, Kanade T, Yin Z, Huh S II. Automatic cell tracking applied to analysis of cell  
492 migration in wound healing assay. In: Proceedings of the Annual International Conference of  
493 the IEEE Engineering in Medicine and Biology Society, EMBS. 2011.
- 494 15. Chen X, Zhou X, Wong STC. Automated segmentation, classification, and tracking of cancer  
495 cell nuclei in time-lapse microscopy. IEEE Trans Biomed Eng. 2006;
- 496 16. Dufour A, Olivo-Marin JC. Tracking live cells in 4D microscopy: From active surfaces to  
497 active meshes. In: Conference Record - Asilomar Conference on Signals, Systems and  
498 Computers. 2008.
- 499 17. Chenouard N, Smal I, de Chaumont F, Maška M, Sbalzarini IF, Gong Y, et al. Objective  
500 comparison of particle tracking methods. Nat Methods [Internet]. 2014 Jan 19 [cited 2016 Oct  
501 4];11(3):281–9. Available from: <http://www.nature.com/doi/10.1038/nmeth.2808>
- 502 18. Rizk A, Paul G, Incardona P, Bugarski M, Mansouri M, Niemann A, et al. Segmentation and  
503 quantification of subcellular structures in fluorescence microscopy images using Squassh. Nat  
504 Protoc [Internet]. 2014 Feb 13 [cited 2016 Oct 12];9(3):586–96. Available from:

- 505 <http://www.nature.com/doi/10.1038/nprot.2014.037>
- 506 19. Ta VT, Lézoray O, Elmoataz A, Schüpp S. Graph-based tools for microscopic cellular image  
507 segmentation. *Pattern Recognit.* 2009;
- 508 20. Hennig GW, Gould TW, Koh SD, Corrigan RD, Heredia DJ, Shonnard MC, et al. Use of  
509 genetically encoded calcium indicators (GECIs) combined with advanced motion tracking  
510 techniques to examine the behavior of neurons and glia in the enteric nervous system of the  
511 intact murine colon. *Front Cell Neurosci.* 2015;
- 512 21. Padfield D, Rittscher J, Thomas N, Roysam B. Spatio-temporal cell cycle phase analysis using  
513 level sets and fast marching methods. *Med Image Anal [Internet]*. 2009 Feb 1 [cited 2019 Jul  
514 9];13(1):143–55. Available from:  
515 <https://www.sciencedirect.com/science/article/pii/S1361841508000844>
- 516 22. Dzyubachyk O, Van Cappellen WA, Essers J, Niessen WJ, Meijering E. Advanced level-set-  
517 based cell tracking in time-lapse fluorescence microscopy. *IEEE Trans Med Imaging.* 2010;
- 518 23. Chan TF, Vese LA. Active contours without edges. *IEEE Trans Image Process.* 2001;
- 519 24. Dufour A, Shinin V, Tajbakhsh S, Guillén-Aghion N, Olivo-Marin JC, Zimmer C. Segmenting  
520 and tracking fluorescent cells in dynamic 3-D microscopy with coupled active surfaces. *IEEE*  
521 *Trans Image Process.* 2005;
- 522 25. Ray N, Acton ST, Ley K. Tracking leukocytes in vivo with shape and size constrained active  
523 contours. *IEEE Trans Med Imaging.* 2002;
- 524 26. Dufour A, Thibeaux R, Labruyère E, Guillén N, Olivo-Marin JC. 3-D active meshes: Fast  
525 discrete deformable models for cell tracking in 3-D time-lapse microscopy. *IEEE Trans Image*  
526 *Process.* 2011;
- 527 27. Barbosa D, Dietenbeck T, Schaerer J, D’Hooge J, Friboulet D, Bernard O. B-spline explicit  
528 active surfaces: An efficient framework for real-time 3-D region-based segmentation. *IEEE*  
529 *Trans Image Process.* 2012;
- 530 28. Chen A, Deeley MA, Niermann KJ, Moretti L, Dawant BM. Combining registration and  
531 active shape models for the automatic segmentation of the lymph node regions in head and  
532 neck CT images. *Med Phys.* 2010;

- 533 29. Pedrosa J, Barbosa D, Heyde B, Schnell F, Rosner A, Claus P, et al. Left Ventricular  
534 Myocardial Segmentation in 3-D Ultrasound Recordings: Effect of Different Endocardial and  
535 Epicardial Coupling Strategies. *IEEE Trans Ultrason Ferroelectr Freq Control* [Internet]. 2017  
536 Mar [cited 2017 Sep 25];64(3):525–36. Available from:  
537 <http://www.ncbi.nlm.nih.gov/pubmed/27992332>
- 538 30. Barbosa D, Dietenbeck T, Heyde B, Houle H, Friboulet D, D’hooge J, et al. Fast and Fully  
539 Automatic 3-D Echocardiographic Segmentation Using B-Spline Explicit Active Surfaces:  
540 Feasibility Study and Validation in a Clinical Setting. *Ultrasound Med Biol*. 2013;
- 541 31. Barbosa D, Bernard O, Heyde B, Dietenbeck T, Houle H, Friboulet D, et al. B-spline explicit  
542 active tracking of surfaces (BEATS): Application to real-time 3D segmentation and tracking  
543 of the left ventricle in 3D echocardiography. In: *IEEE International Ultrasonics Symposium,*  
544 *IUS*. 2012. p. 224–7.
- 545 32. A Fully Global Approach to Image Segmentation via Coupled Curve Evolution Equations. *J*  
546 *Vis Commun Image Represent* [Internet]. 2002 Mar 1 [cited 2017 Sep 25];13(1–2):195–216.  
547 Available from: <http://www.sciencedirect.com/science/article/pii/S1047320301905000>
- 548 33. Solomon B, Gray A. *Modern Differential Geometry of Curves and Surfaces*. *Am Math Mon*.  
549 2006;
- 550 34. Mohammed AI, Gritton HJ, Tseng HA, Bucklin ME, Yao Z, Han X. An integrative approach  
551 for analyzing hundreds of neurons in task performing mice using wide-field calcium imaging.  
552 *Sci Rep*. 2016;
- 553 35. Morais P, Vilaça JL, Queirós S, Bourier F, Deisenhofer I, Tavares JMRS, et al. A competitive  
554 strategy for atrial and aortic tract segmentation based on deformable models. *Med Image Anal*.  
555 2017;
- 556 36. Johnson HJ, Christensen GE. Consistent landmark and intensity-based image registration. In:  
557 *IEEE Transactions on Medical Imaging*. 2002.
- 558 37. Broit C. Optimal registration of deformed images. *Optimal registration of deformed images*.  
559 1981.
- 560 38. Bogovic JA, Hanslovsky P, Wong A, Saalfeld S. Robust registration of calcium images by



- 561 learned contrast synthesis. In: Proceedings - International Symposium on Biomedical Imaging.  
562 2016.
- 563 39. Goshtasby A. Piecewise linear mapping functions for image registration. Pattern Recognit.  
564 1986;
- 565 40. Grădinaru C, Łopacińska JM, Huth J, Kestler HA, Flyvbjerg H, Mølhav K. Assessment of  
566 automated analyses of cell migration on flat and nanostructured surfaces [Internet]. Vol. 1,  
567 Computational and Structural Biotechnology Journal. Research Network of Computational  
568 and Structural Biotechnology; 2012 [cited 2020 Aug 25]. p. e201207004. Available from:  
569 </pmc/articles/PMC3962212/?report=abstract>
- 570 41. Hennig GW. Spatio-temporal mapping and the enteric nervous system. In: Advances in  
571 Experimental Medicine and Biology. 2016.
- 572 42. Hennig GW, Gould TW, Koh SD, Corrigan RD, Heredia DJ, Shonnard MC, et al. Use of  
573 Genetically Encoded Calcium Indicators (GECIs) Combined with Advanced Motion Tracking  
574 Techniques to Examine the Behavior of Neurons and Glia in the Enteric Nervous System of  
575 the Intact Murine Colon. Front Cell Neurosci [Internet]. 2015 Nov 10 [cited 2019 Jan  
576 10];9:436. Available from:  
577 <http://journal.frontiersin.org/Article/10.3389/fncel.2015.00436/abstract>
- 578 43. Hennig GW, Spencer NJ, Jokela-Willis S, Bayguinov PO, Lee HT, Ritchie LA, et al. ICC-MY  
579 coordinate smooth muscle electrical and mechanical activity in the murine small intestine.  
580 Neurogastroenterol Motil. 2010;
- 581 44. Ulman V, Maška M, Magnusson KEG, Ronneberger O, Haubold C, Harder N, et al. An  
582 objective comparison of cell-tracking algorithms. Nat Methods. 2017;
- 583 45. Bresson X, Esedoglu S, Vanderghyest P, Thiran JP, Osher S. Fast global minimization of the  
584 active contour/snake model. J Math Imaging Vis. 2007;

585

586 **Supplementary information:** see separate file

587 **Supplementary movies:**

588 **Movie 1:** The artificial dataset used for parameter sensitivity analysis: 7 overlapping cells with bright  
589 cytoplasm and dark nuclei representing moving and overlapping neurons in a noisy and blurry scene.

590 **Movie 2:** Example of the one-layer contours approach to track multiple neurons in ENS tissue

591 **Movie 3:** Example of the double contours approach to track overlapping neurons, with similar  
592 intensity baselevels in ENS tissue during stimulation.

593 **Movie 4:** Example of the one-layer contours approach in combination with ROI tracking to track  
594 multiple neurons during large deformation in ENS tissue.

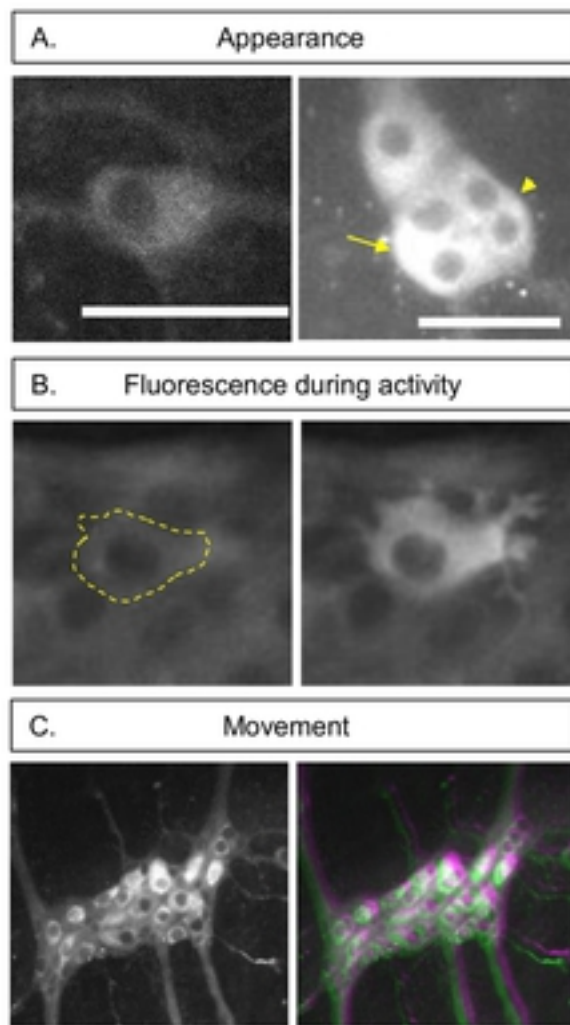

Figure 1

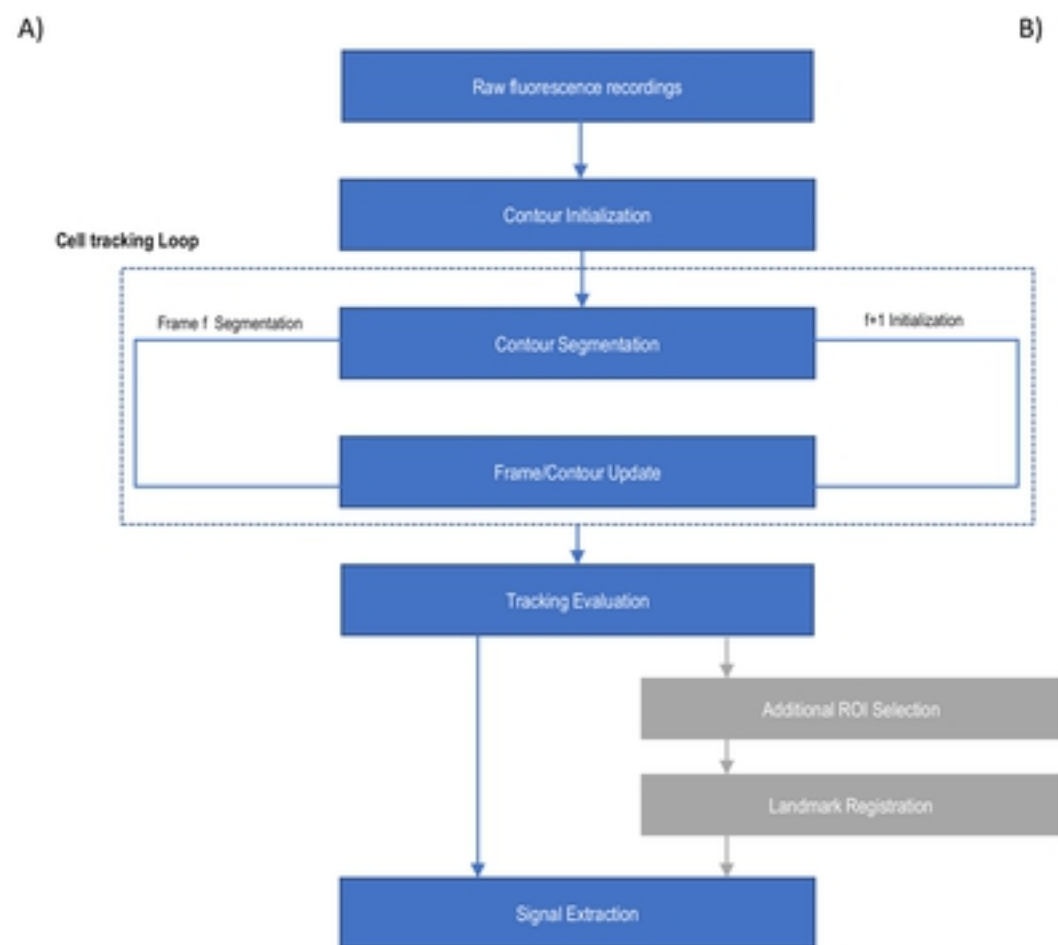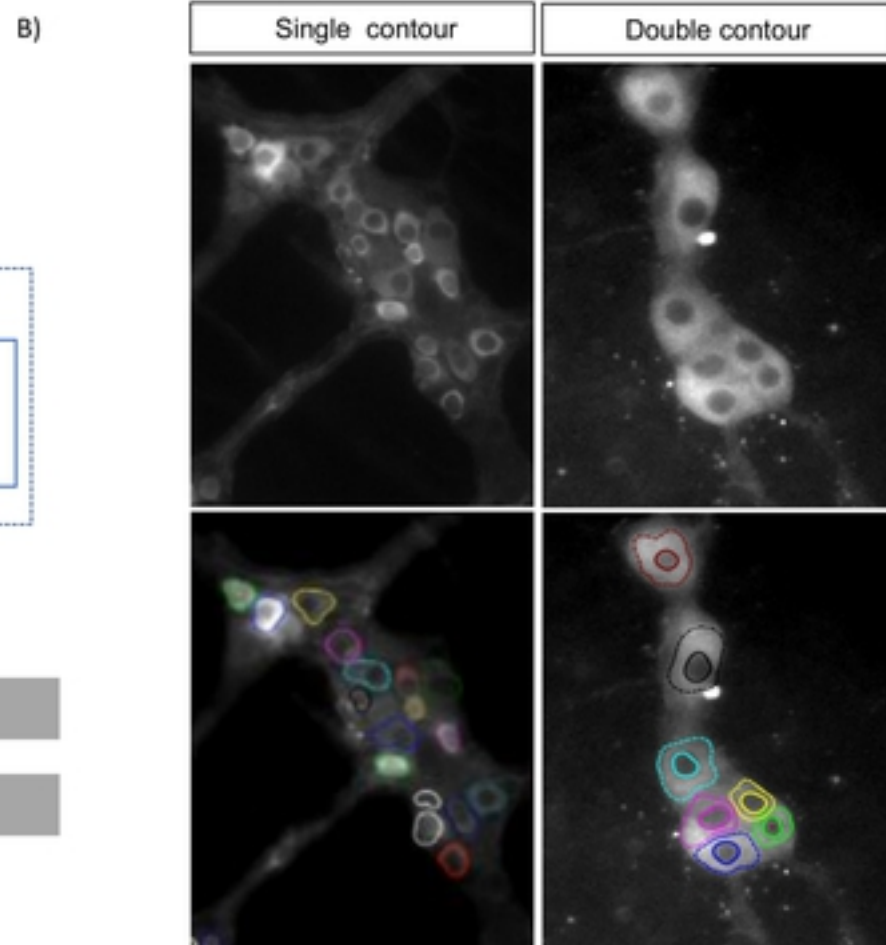

Figure 2

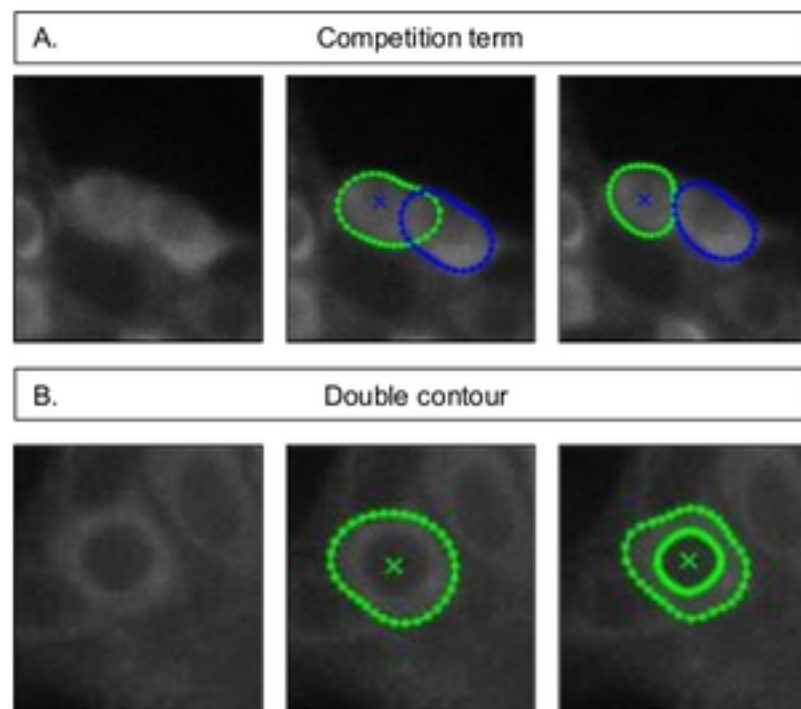

Figure 3

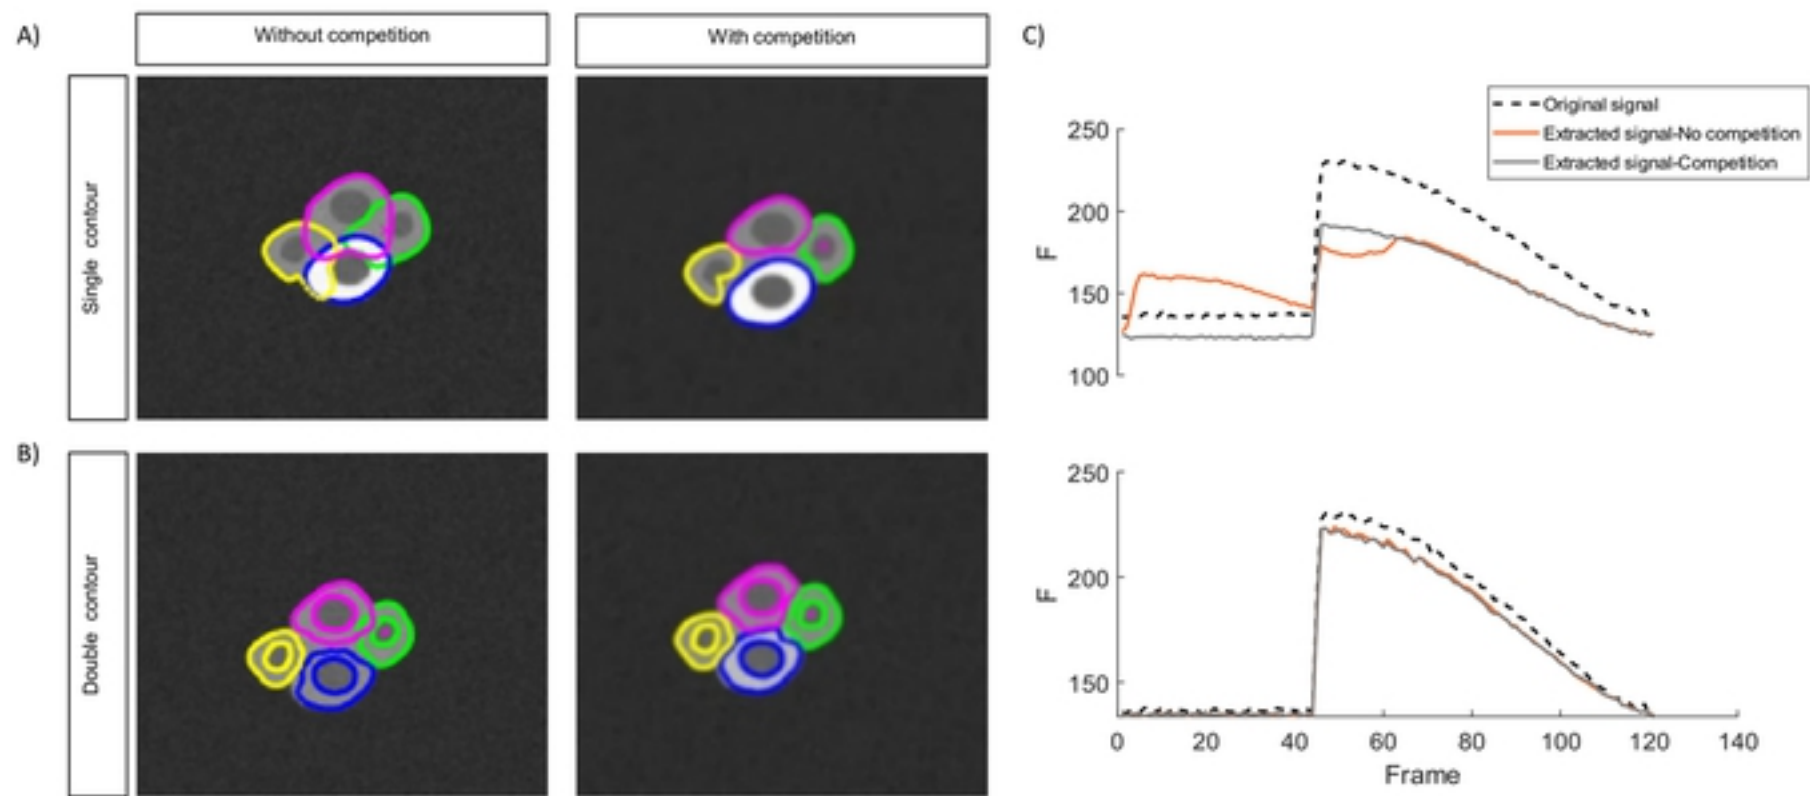

Figure 4

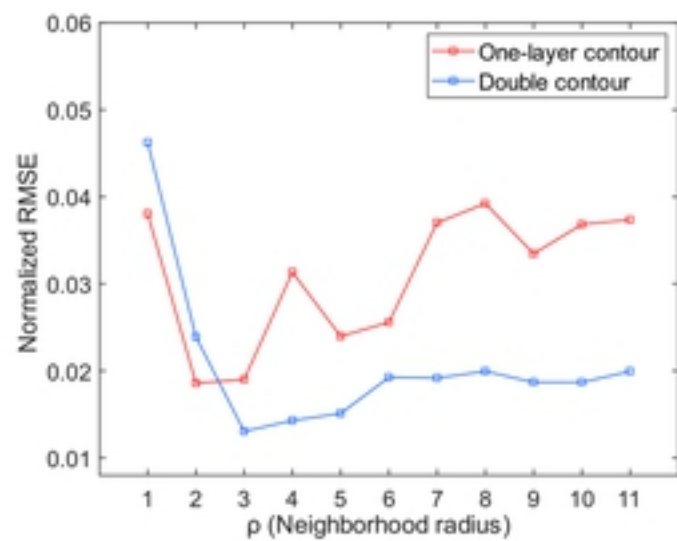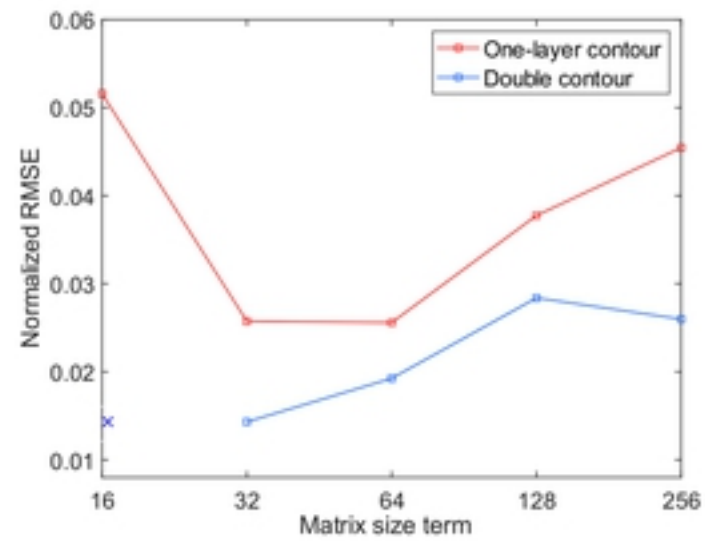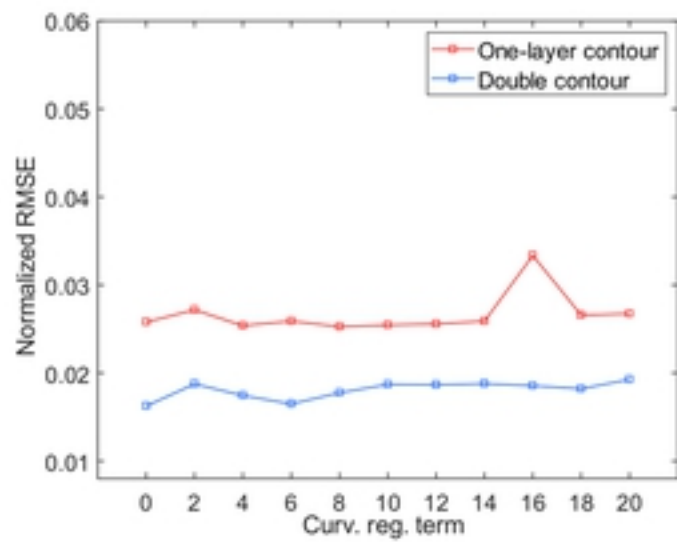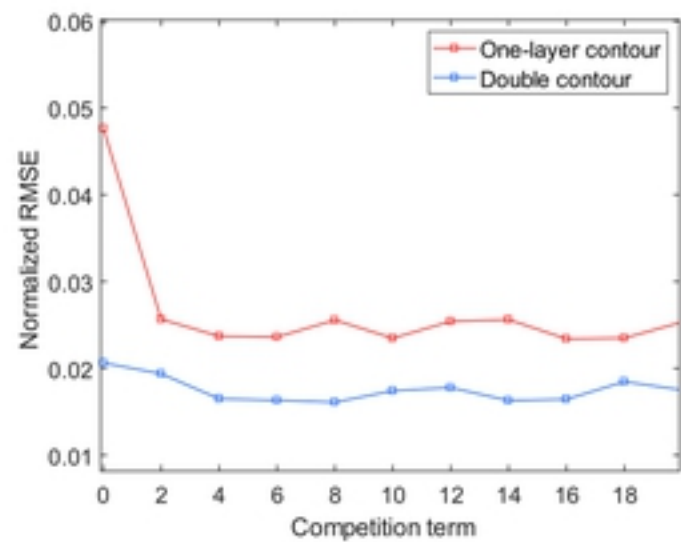

Figure 5

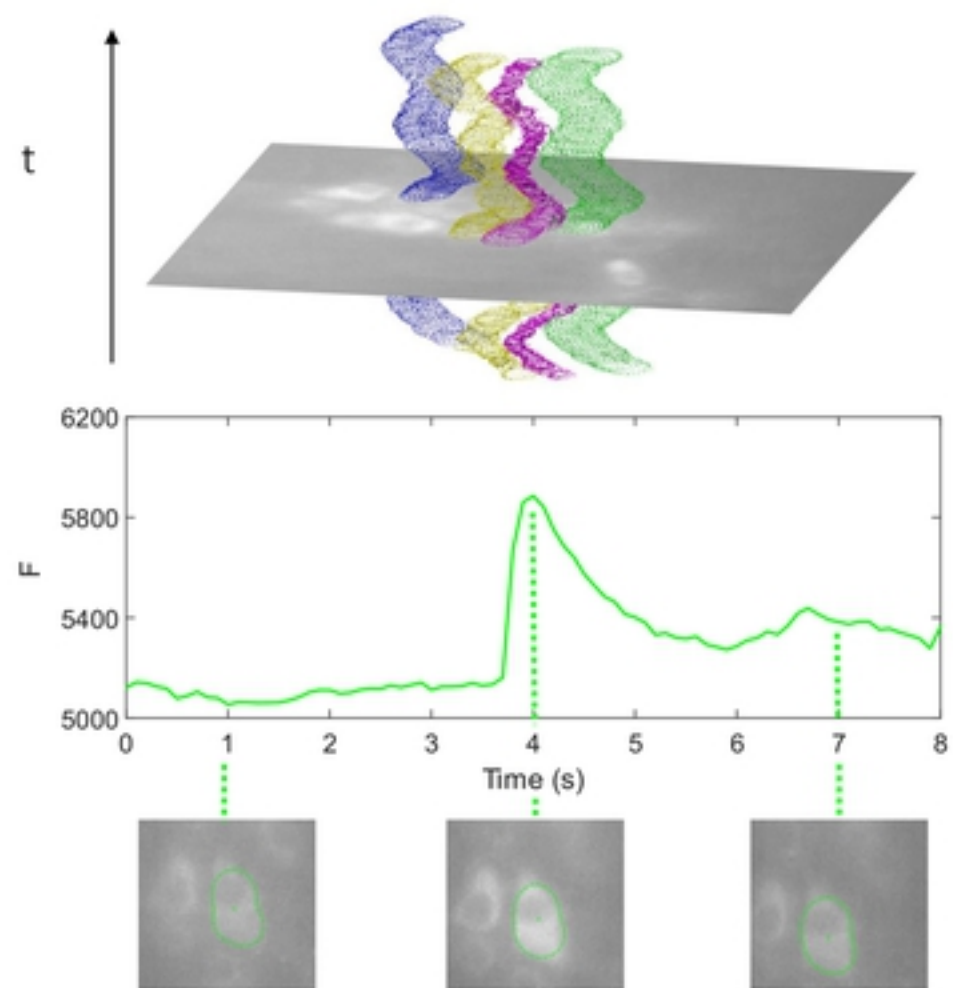

Figure 6



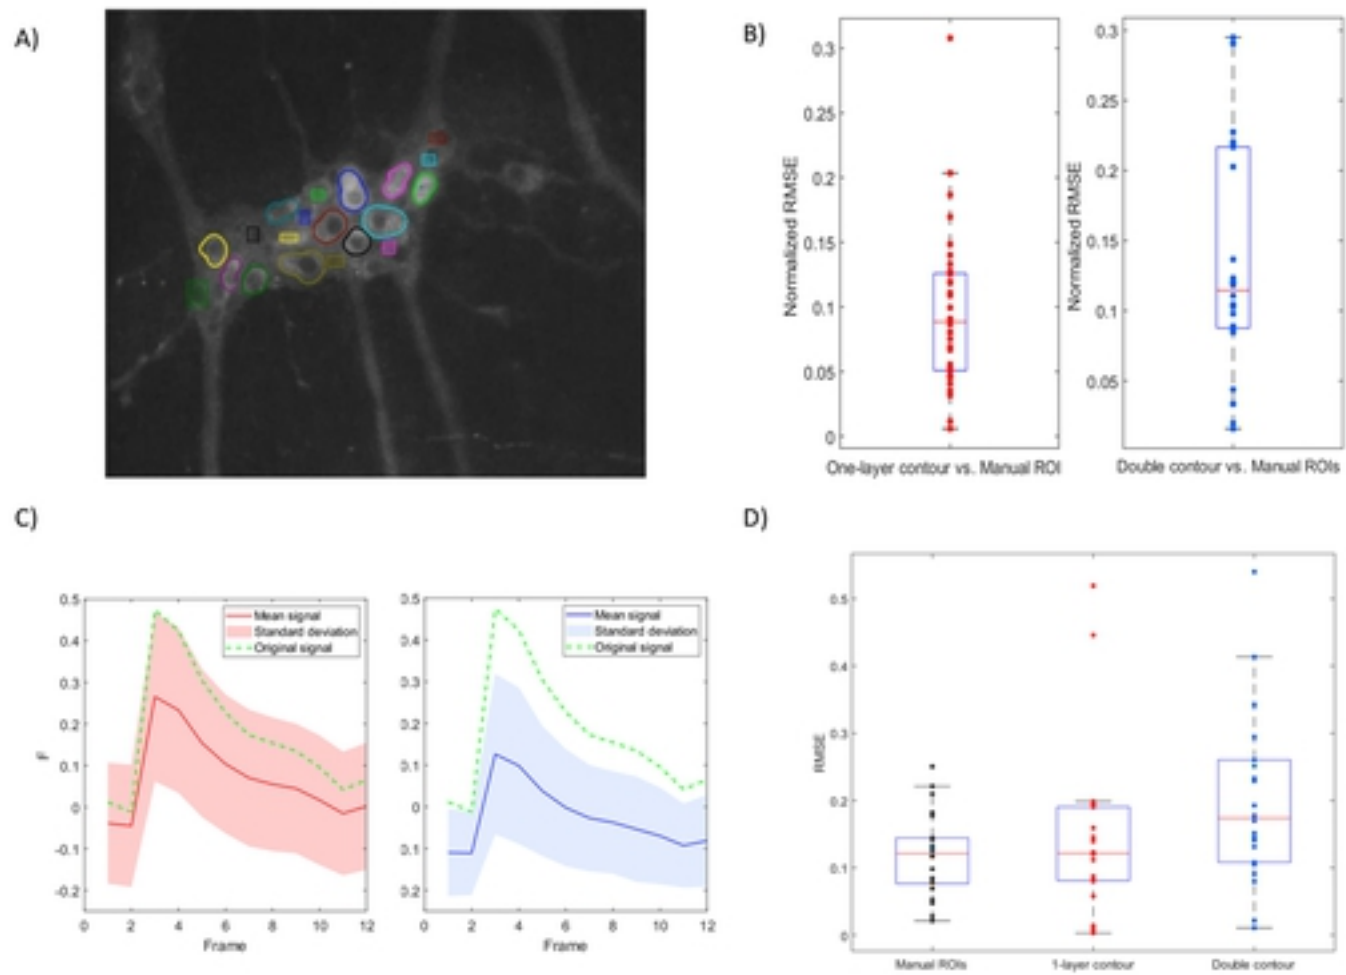

Figure 7
